# Supplementary material for: Covariates of a healthy diet and physical activity self-management one year after Bariatric surgery: A cross-sectional study
Source: PLoS One. 2023 Oct 18;18(10):e0287137. doi: 10.1371/journal.pone.0287137 (PMC10584161; doi:10.1371/journal.pone.0287137)
Supplement: S1 Data — (XLSX) [file pone.0287137.s001.xlsx]

## Sheet: Untitled7
Age	Sex	Marital status	education	Economic	t.Task - Coping Self-Efficacy.q2	t.Task - Coping Self-Efficacy.q3	t.Task - Coping Self-Efficacy.q4	t.Action Planning.q1	t.Action Planning.q2	t.Action Planning.q3	t.Coping planning.q1	t.Coping planning.q2	t.Coping planning.q3	t.Coping planning.q4	t.Recovery self-efficacy.q1	t.Recovery self-efficacy.q2	t.Recovery self-efficacy.q3	t.Risk Perception.q1	t.Risk Perception.q2	t.Risk Perception.q3	t.Risk Perception.q4	t.Outcome Expectancies.q1	t.Outcome Expectancies.q2	t.Outcome Expectancies.q3	t.Outcome Expectancies.q4	t.Behavioral Intentions.q1	t.Behavioral Intentions.q2	f.Task - Coping Self-Efficacy.q1	f.Task - Coping Self-Efficacy.q2	f.Task - Coping Self-Efficacy.q3	f.Action Planning.q1	f.Action Planning.q2	f.Action Planning.q3	f.Action Planning.q4	f.Coping planning.q1	f.Coping planning.q2	f.Coping planning.q3	f.Recovery self-efficacy.q1	f.Recovery self-efficacy.q2	f.Recovery self-efficacy.q3	f.Risk Perception.q1	f.Risk Perception.q2	f.Risk Perception.q3	f.Outcome Expectancies.q1	f.Outcome Expectancies.q2	f.Outcome Expectancies.q3	f.Outcome Expectancies.q4	f.Behavioral Intentions.q1	f.Behavioral Intentions.q2
32	1	1	3	2	4	4	5	4	4	4	4	4	4	1	4	1	2	5	5	4	5	5	4	4	4	5	5	5	5	5	5	5	5	5	5	5	5	5	5	5	5	5	5	5	5	5	5	5	5
32	2	1	2	2	4	4	4	4	4	3	3	4	4	4	5	5	5	3	4	5	3	4	5	5	5	3	3	5	5	5	4	4	5	5	3	4	4	4	4	4	5	3	5	5	5	5	5	5	4
40	2	2	3	3	5	5	5	2	5	4	5	5	4	5	4	5	5	5	5	2	1	5	5	5	5	5	5	5	5	5	5	5	5	5	5	5	5	5	4	4	5	5	5	5	5	5	5	5	2
42	2	2	2	2	3	4	4	4	4	4	4	5	5	5	4	4	3	5	4	4	4	5	5	5	5	5	5	5	5	5	5	5	5	5	5	5	5	5	5	5	4	5	5	5	5	5	5	5	5
53	2	2	4	2	4	3	3	3	3	4	4	4	4	4	2	2	1	5	5	3	5	4	3	4	5	2	3	5	5	5	3	3	3	3	4	3	3	4	4	3	3	3	5	2	4	4	4	5	2
39	2	2	2	2	1	4	2	4	4	4	2	2	2	3	5	4	4	1	1	4	5	5	4	5	5	4	4	3	3	4	4	3	3	3	4	4	4	2	2	4	5	5	5	5	5	5	5	4	4
54	2	2	2	2	4	5	4	5	4	3	5	5	5	3	5	5	2	5	5	4	1	5	5	5	5	5	4	4	4	1	3	3	3	3	4	5	4	5	4	4	5	5	5	5	5	5	5	5	2
34	2	1	4	3	2	1	3	4	5	5	4	4	5	5	5	5	2	5	5	1	5	5	4	5	5	4	4	4	2	5	5	5	4	5	4	3	5	5	5	5	5	5	5	5	5	5	5	5	5
35	2	2	4	2	2	4	4	2	2	2	2	2	2	2	2	5	5	5	5	5	5	5	5	5	5	4	4	4	4	4	4	4	4	4	4	4	4	5	4	5	4	2	4	5	5	5	5	5	4
36	2	1	3	3	5	5	5	4	5	5	5	5	5	5	5	5	5	5	5	2	5	5	5	5	5	5	5	5	5	5	5	5	5	5	5	5	5	5	5	5	5	5	5	5	5	5	5	5	3
40	2	2	3	2	1	1	5	5	3	5	5	5	4	1	1	4	3	5	5	3	5	5	5	5	5	5	5	2	4	4	2	3	4	4	4	4	4	5	5	5	4	4	4	5	5	5	5	4	2
17	1	1	2	3	4	3	2	4	4	4	2	2	4	4	4	5	4	4	4	4	4	5	5	4	5	4	4	2	2	3	3	3	3	3	4	4	4	4	4	4	4	4	5	4	4	4	4	3	3
29	2	2	2	1	4	3	2	4	4	4	4	5	4	4	4	2	4	5	5	4	5	5	5	5	5	5	5	2	2	3	4	4	3	4	4	4	3	4	4	4	5	4	5	5	4	5	5	5	2
38	2	2	2	2	5	5	3	5	4	5	4	2	5	5	5	5	5	2	1	2	4	5	5	5	5	5	5	5	5	5	4	4	5	4	5	5	5	5	5	5	5	5	5	5	5	5	5	5	5
45	2	2	2	2	1	2	5	5	5	5	4	4	5	5	5	5	1	5	5	1	5	5	5	5	5	5	5	4	4	5	4	4	4	4	5	5	4	5	5	5	5	5	5	5	5	5	5	4	4
41	2	2	3	3	1	5	5	5	5	5	5	5	5	5	1	1	1	5	5	3	5	5	5	5	5	4	4	1	1	2	1	1	1	1	2	1	1	3	3	3	2	3	5	5	5	5	5	3	3
48	2	2	2	2	4	4	5	5	5	5	2	4	4	4	4	5	1	5	5	5	5	5	5	5	5	5	5	5	5	5	5	5	5	5	4	3	5	5	5	5	5	5	5	5	5	5	5	5	5
31	1	1	4	3	5	1	5	5	5	5	5	5	5	5	5	5	5	5	5	5	5	5	5	5	5	5	4	5	5	5	5	5	5	5	3	5	5	5	5	5	5	5	5	5	5	5	5	5	5
33	2	2	4	2	1	3	2	5	4	4	5	5	5	5	1	5	5	5	5	5	5	5	5	5	5	5	5	2	2	2	5	4	4	3	5	5	5	5	5	5	5	5	5	5	5	5	5	5	1
43	2	2	2	2	5	4	5	5	5	5	2	2	4	5	2	2	4	5	5	5	5	5	5	5	5	5	5	5	5	5	5	5	5	5	5	5	5	5	5	5	5	5	5	5	5	5	5	3	5
27	2	1	4	2	4	5	2	4	4	4	2	2	4	4	4	4	4	4	4	4	3	5	4	4	4	4	4	4	4	4	4	5	5	5	4	5	4	4	5	5	3	3	5	4	5	4	4	5	4
39	2	2	4	3	4	4	4	3	4	4	4	2	4	4	3	3	4	5	5	5	5	5	5	5	5	5	5	4	4	4	4	4	4	4	4	4	4	3	3	3	5	5	5	4	5	5	5	5	5
64	2	2	3	2	3	5	5	5	5	5	5	5	5	5	5	5	5	5	5	1	5	5	5	5	5	5	5	4	4	4	4	5	5	4	4	4	4	5	5	5	5	5	5	5	5	5	5	5	4
33	2	1	4	3	4	4	4	5	5	4	5	4	4	4	5	5	5	5	5	5	5	5	5	5	5	4	4	5	5	5	4	5	5	5	5	5	5	5	5	5	5	5	5	5	5	5	5	5	5
51	2	2	4	2	4	5	1	4	4	3	4	4	3	4	4	4	4	5	5	5	5	5	3	5	5	5	4	1	2	3	1	3	2	3	3	3	2	4	3	4	2	4	4	5	4	5	5	3	3
45	2	2	2	2	5	2	4	5	4	3	2	5	5	5	5	4	2	5	5	5	5	5	5	5	5	5	5	5	5	5	5	5	5	3	5	5	5	5	5	5	5	5	5	5	5	5	5	5	5
37	2	2	3	3	4	5	4	5	5	5	5	4	5	5	1	2	2	5	3	1	5	5	5	5	5	5	5	3	3	4	5	5	5	5	5	5	5	4	4	5	3	4	4	5	5	5	5	5	3
50	2	2	2	2	3	4	5	2	5	5	4	5	5	5	4	2	5	5	5	5	3	5	5	5	5	5	5	5	4	4	5	5	5	5	5	5	5	5	5	5	5	5	5	5	5	5	5	4	2
34	1	2	3	3	3	5	5	4	5	4	5	5	5	3	5	5	5	5	5	1	5	5	5	5	5	4	4	2	4	1	2	2	2	2	2	4	4	2	2	3	3	3	3	5	5	5	5	4	4
24	1	1	2	2	2	5	3	5	5	5	5	5	5	5	2	5	4	3	5	4	4	5	5	5	5	5	4	3	3	3	3	3	3	3	3	3	5	3	3	5	2	4	4	5	5	5	5	3	3
38	2	1	4	3	1	4	2	1	2	1	1	1	1	1	1	1	1	5	5	5	5	5	5	5	5	1	1	4	5	5	3	5	3	5	1	1	1	5	5	5	2	1	4	5	5	5	5	5	4
23	2	1	3	2	4	5	4	5	5	5	5	4	4	5	5	5	5	5	5	5	5	5	5	5	5	5	5	4	4	4	4	4	4	4	4	4	3	5	5	5	5	5	5	5	5	5	5	5	5
23	2	1	3	2	5	5	4	4	4	4	4	5	4	4	5	5	5	5	5	4	5	5	5	5	5	4	4	5	5	5	4	5	5	5	5	5	5	5	5	5	5	5	5	5	5	5	5	5	5
35	2	2	3	2	5	5	5	4	5	3	4	4	4	5	5	2	1	5	5	2	5	5	3	5	5	4	4	5	5	5	5	5	4	5	5	4	4	5	5	5	5	5	5	5	5	5	5	5	5
26	2	2	3	2	4	4	3	3	4	4	4	4	3	3	5	4	4	5	4	2	5	4	4	5	5	3	4	4	4	4	4	4	4	4	4	3	4	5	5	5	3	4	5	4	5	5	5	4	4
27	2	1	3	3	1	2	1	4	2	3	2	1	3	3	4	3	4	4	5	5	5	5	4	5	5	3	3	5	5	5	4	5	5	5	5	5	5	5	5	5	4	4	5	5	5	5	5	5	5
26	1	1	3	2	2	2	2	1	1	1	1	1	1	1	2	2	2	4	2	4	3	2	2	2	2	1	1	4	4	4	4	4	4	4	4	4	4	4	4	4	5	5	5	5	5	5	5	5	5
45	2	2	2	2	3	4	3	4	4	4	4	3	5	4	5	5	5	5	5	5	5	5	5	5	5	4	4	3	4	5	4	5	4	5	5	5	4	5	5	5	5	5	5	5	5	5	5	5	4
38	2	2	3	2	5	5	5	5	5	5	5	5	5	5	5	5	4	4	5	4	4	5	5	5	5	5	5	5	5	5	5	5	5	5	5	5	5	5	5	4	4	2	4	5	5	5	5	5	5
54	2	2	2	2	4	3	4	3	5	4	5	5	5	5	5	3	4	5	5	3	5	5	5	5	5	3	3	4	4	4	3	3	3	3	2	4	3	4	4	4	4	4	4	5	5	5	5	4	3
36	2	2	2	2	5	5	1	4	4	5	5	5	4	5	4	3	4	5	5	4	5	5	5	5	5	5	5	5	5	5	4	4	4	4	5	5	5	3	4	2	3	4	5	5	5	5	5	4	2
19	2	1	2	2	3	4	4	4	5	4	4	3	3	4	5	5	3	5	5	5	5	4	5	5	5	5	5	3	3	4	4	4	4	5	4	4	5	5	4	3	3	3	3	5	5	5	5	3	3
39	2	2	3	2	4	5	5	5	5	5	5	5	5	5	5	5	5	5	5	5	5	5	5	5	5	5	5	3	2	3	3	3	3	3	3	3	3	5	5	5	3	3	5	3	5	5	5	3	3
36	2	2	3	2	2	2	1	3	2	2	1	1	2	1	1	1	1	5	4	1	5	5	5	5	4	4	1	1	1	1	3	3	3	3	3	3	3	4	3	4	1	1	4	5	5	5	5	4	4
45	2	2	2	2	4	5	4	4	4	3	4	4	3	2	5	4	5	4	5	4	4	5	5	4	5	5	4	4	4	4	3	4	3	5	4	5	4	5	5	4	5	4	4	4	4	5	5	5	3
47	1	2	3	2	2	2	4	5	5	5	5	5	4	4	2	1	1	5	4	1	1	5	5	5	5	5	5	4	5	4	4	4	4	4	4	4	4	5	5	5	4	4	4	5	5	5	5	4	4
38	2	2	3	2	4	5	5	4	4	4	4	1	5	4	5	5	5	5	5	4	5	5	5	5	5	4	4	5	4	5	4	3	4	4	5	5	5	5	5	5	4	4	5	5	4	5	5	5	5
29	2	2	3	2	3	5	4	5	2	3	5	5	5	4	4	5	4	4	5	5	5	5	5	5	5	4	4	2	3	3	2	3	3	3	3	4	3	4	4	4	4	4	4	4	5	5	5	5	5
40	1	2	4	2	4	1	2	4	3	3	2	3	2	4	4	4	2	5	5	4	3	5	5	5	5	4	3	2	2	2	3	4	2	4	4	4	4	4	4	4	5	4	5	5	5	5	5	5	2
32	1	2	4	2	4	4	4	5	4	5	4	4	4	4	3	2	2	3	3	2	3	5	4	4	4	4	4	5	3	3	5	5	4	4	4	4	4	4	4	4	5	3	3	5	3	4	4	4	3
21	2	1	3	3	4	3	4	3	5	4	3	4	4	4	4	3	4	5	5	3	5	5	5	5	5	5	4	5	5	4	5	4	5	5	4	4	4	4	2	4	5	5	5	5	5	5	5	5	4
37	2	2	3	2	1	1	1	1	1	1	1	1	1	1	1	1	1	2	2	5	2	5	5	5	5	1	1	1	1	1	1	1	1	1	1	1	1	1	1	1	4	4	4	5	5	5	5	1	1
43	2	2	3	2	3	2	4	2	4	4	1	4	2	4	4	4	4	4	4	3	4	5	2	5	5	4	4	5	5	4	4	4	4	4	4	4	4	5	2	2	3	4	5	5	5	5	5	3	3
39	2	2	4	2	2	5	4	5	4	4	2	5	5	4	5	4	5	5	5	1	5	4	5	5	5	2	2	4	5	5	4	4	5	4	4	2	4	4	4	5	4	5	5	5	5	5	5	5	5
29	2	1	4	2	2	4	2	4	4	4	2	2	2	3	4	2	4	2	3	3	4	4	3	4	4	3	3	3	3	3	4	2	2	4	2	2	2	4	4	4	2	2	4	4	4	4	4	3	3
19	1	1	2	2	5	5	5	5	5	5	2	2	5	5	5	3	5	5	5	5	5	5	5	5	5	5	4	3	3	3	3	4	4	4	3	3	3	4	4	3	4	4	5	5	5	5	5	5	2
34	2	1	3	2	5	5	3	4	4	5	4	4	5	5	4	5	5	5	5	5	5	5	5	5	5	5	5	3	4	4	4	4	3	3	4	4	4	3	3	3	5	5	5	5	5	5	5	4	4
48	2	2	2	2	5	5	5	4	4	4	5	5	5	5	5	5	5	5	5	5	5	5	5	5	5	5	5	5	5	5	5	5	4	5	5	5	5	5	5	5	5	5	5	5	5	5	5	5	5
39	1	2	3	2	4	5	2	2	4	4	5	2	4	4	1	2	2	4	4	5	4	5	4	4	5	5	5	4	4	4	4	4	4	4	4	4	4	4	4	4	5	5	2	5	5	5	5	5	2
33	1	2	2	2	5	5	5	4	5	5	5	5	5	5	5	5	5	4	5	5	5	5	5	5	5	4	5	4	5	5	5	5	5	5	5	5	5	5	5	5	5	5	5	5	5	5	5	5	3
30	2	2	4	3	4	2	2	4	4	4	4	4	4	4	4	4	2	4	4	5	5	5	5	5	5	4	4	5	5	5	4	4	4	4	4	4	4	4	3	4	5	4	5	5	5	5	5	4	4
37	2	2	4	2	4	5	4	5	5	4	3	2	4	4	5	5	4	5	5	5	4	5	5	5	5	5	5	3	4	4	4	4	4	4	4	4	5	5	5	5	4	5	3	5	5	5	5	4	2
49	1	2	2	2	5	5	5	3	5	5	5	4	2	5	5	3	5	1	3	5	5	5	5	5	2	4	3	5	3	5	4	4	2	5	4	5	5	5	4	5	5	5	5	5	5	5	5	5	5
52	2	1	4	3	4	4	2	2	2	2	2	2	2	2	4	4	4	5	5	5	4	5	4	4	5	4	4	2	2	2	4	2	2	3	2	2	2	4	4	4	5	5	5	5	5	5	5	5	4
48	2	2	2	2	5	5	5	4	5	5	4	4	4	4	5	5	4	5	5	5	5	5	5	5	5	5	5	2	4	2	3	3	3	3	5	5	5	4	4	5	2	2	5	5	5	5	5	5	5
36	2	2	4	2	2	4	4	4	4	4	4	4	4	4	4	4	4	5	5	2	5	5	5	5	5	4	4	5	5	5	4	5	5	5	4	4	4	5	5	5	3	2	4	4	4	5	5	5	2
38	1	2	4	2	2	4	1	2	2	2	3	1	2	2	1	2	1	5	2	3	5	4	5	5	5	1	1	3	3	3	4	3	3	3	1	2	2	4	4	4	1	1	5	4	4	4	5	3	3
40	2	2	3	2	4	4	5	4	4	5	5	5	5	5	2	4	4	5	5	5	5	5	5	5	5	5	5	4	5	5	5	5	4	5	5	5	4	5	5	5	5	5	4	5	5	5	5	5	5
34	2	1	3	2	4	5	5	5	5	5	5	5	5	4	4	4	5	5	5	5	5	5	5	5	5	5	4	5	5	5	5	5	5	5	4	4	4	5	5	5	5	5	5	5	5	5	5	5	5
30	1	1	4	2	5	2	2	4	4	4	4	2	4	4	2	2	1	2	4	4	1	5	5	5	5	4	3	5	5	5	4	4	4	4	4	4	4	5	4	5	1	2	2	5	5	5	5	5	5
26	1	1	3	2	4	5	5	5	5	5	3	1	4	5	3	5	4	5	5	5	5	5	5	5	5	5	3	5	5	5	5	5	5	5	5	5	5	5	5	5	4	5	5	5	5	5	5	5	4
44	1	2	4	3	4	2	2	5	5	5	5	5	5	5	2	2	4	5	5	5	5	5	5	5	5	5	5	4	4	4	4	4	4	4	5	5	5	3	3	3	4	5	4	5	5	5	5	4	3
26	2	2	3	2	5	5	4	4	4	4	2	5	4	4	5	4	4	4	3	5	5	5	5	5	5	5	5	1	3	3	4	3	4	4	5	5	5	5	5	5	5	5	5	5	5	5	5	5	4
43	1	1	4	2	1	5	4	1	1	5	1	1	1	1	5	4	5	1	1	1	1	5	3	5	4	1	1	1	1	3	1	1	1	1	1	1	1	1	2	2	1	1	4	4	5	5	5	1	1
50	2	2	2	3	5	5	5	5	5	5	5	5	4	4	1	1	2	1	5	5	1	5	5	5	5	5	5	3	3	3	3	3	3	3	4	4	2	5	5	5	5	5	5	5	5	5	5	5	5
32	2	2	3	2	2	5	5	3	5	4	2	4	5	5	1	1	2	5	5	5	5	5	5	5	5	4	3	5	5	5	3	4	4	2	5	5	5	5	5	5	4	4	5	5	5	5	5	5	5
51	2	2	2	2	4	5	5	5	5	5	5	5	5	5	5	4	3	5	3	5	2	5	5	5	5	5	5	5	5	5	5	5	5	5	5	5	5	5	5	5	2	5	5	5	5	5	5	5	5
20	2	1	2	2	3	2	2	4	5	5	2	3	4	4	3	2	4	4	4	4	4	4	3	4	4	2	2	2	2	3	2	4	4	3	4	3	4	5	3	4	5	5	5	4	3	4	4	4	3
23	1	1	2	2	5	5	4	3	4	2	5	5	2	4	5	5	5	4	5	3	5	5	5	4	1	3	3	5	5	5	4	4	4	4	5	3	3	5	4	5	2	4	1	5	4	1	2	4	4
50	2	2	3	3	4	4	4	4	4	4	4	4	4	3	4	4	2	5	5	5	5	5	5	5	5	3	3	5	4	2	3	3	3	4	2	3	3	4	3	3	5	5	5	5	5	5	5	3	3
26	2	1	2	2	1	1	3	3	3	1	3	3	2	3	5	1	4	5	5	4	5	5	5	5	5	5	3	4	3	3	1	3	4	2	5	4	5	5	5	1	5	5	5	2	5	5	5	5	5
61	2	1	3	2	4	2	2	4	4	4	4	2	2	3	2	2	2	4	4	4	4	4	4	4	4	3	3	2	2	2	4	4	4	4	4	4	4	4	4	4	4	4	4	4	4	4	4	4	2
41	1	2	3	2	1	5	3	5	4	5	5	5	4	4	4	4	4	5	5	3	4	5	5	5	3	4	4	5	5	5	3	4	4	3	5	3	4	5	5	5	5	5	5	5	5	5	5	5	5
52	2	2	2	2	3	2	3	4	4	4	4	4	4	4	4	4	4	4	4	4	4	4	4	4	4	3	3	4	4	4	4	4	4	4	4	4	4	4	4	4	4	4	4	4	4	4	4	2	4
40	1	2	2	2	2	1	3	4	4	4	4	2	4	4	4	4	2	5	5	3	4	5	5	5	5	5	5	4	4	4	5	4	4	5	5	5	5	5	5	5	5	5	5	5	5	5	5	4	2
36	2	2	4	2	1	3	1	4	2	1	4	1	3	3	5	5	4	5	5	5	5	5	4	4	5	3	3	2	2	4	5	4	4	4	5	3	4	5	5	5	5	5	5	5	5	5	5	5	4
34	2	2	3	2	1	4	3	5	4	4	3	4	3	5	5	4	3	1	5	1	5	5	5	5	5	5	5	5	5	5	5	3	4	3	5	4	5	5	5	5	5	5	3	5	5	4	4	3	3
17	2	1	2	2	4	3	2	3	3	3	3	3	3	3	3	3	3	5	3	5	2	5	5	5	4	4	4	3	2	3	3	3	3	3	3	3	3	3	3	3	4	4	2	3	4	4	5	3	3
31	2	2	3	3	4	5	4	2	2	2	2	2	4	4	4	4	4	4	5	5	4	5	5	5	5	5	3	3	4	2	2	2	2	2	2	2	2	2	4	4	4	5	5	5	5	5	5	4	2
26	2	2	3	2	4	5	4	5	5	5	4	5	4	5	5	5	5	5	5	5	5	5	5	5	5	5	3	2	2	2	5	5	2	3	4	3	4	5	5	5	5	5	5	5	5	5	5	5	2
38	2	2	4	3	2	4	4	5	4	4	3	4	4	4	4	4	3	5	5	4	5	5	5	5	5	5	5	4	3	3	3	3	3	4	3	3	3	4	4	4	3	3	5	5	5	5	5	4	4
41	2	2	2	2	3	4	5	4	5	5	4	3	4	3	4	4	5	5	4	5	5	5	5	5	5	#NULL!	#NULL!	5	5	4	3	4	4	5	3	3	4	5	5	4	5	5	5	5	5	5	5	5	3
32	1	2	2	2	2	5	4	1	1	2	2	4	2	2	1	1	2	2	2	2	2	2	2	2	2	1	1	4	4	4	3	3	4	3	3	2	2	2	2	3	1	1	5	1	2	4	2	1	1
42	1	2	2	2	1	3	4	5	5	3	2	3	5	4	1	2	1	5	5	4	1	5	5	5	5	3	4	5	4	5	3	4	4	5	4	5	5	4	4	3	5	5	5	5	5	5	5	5	5
38	2	1	4	2	5	4	1	2	1	1	1	1	1	2	5	5	3	1	2	2	3	5	5	5	5	5	5	1	3	5	3	3	3	5	3	4	3	4	3	2	3	4	4	5	5	5	5	4	5
33	2	2	3	2	2	5	4	4	2	2	1	4	4	4	4	4	2	4	1	4	4	4	4	5	3	3	4	2	2	4	2	2	2	3	2	2	4	4	4	4	4	4	4	5	5	5	5	4	2
47	2	1	2	2	1	5	3	5	5	5	5	5	5	4	5	3	1	5	5	2	5	5	5	5	5	4	5	5	5	5	5	5	5	5	5	5	5	5	5	5	1	5	5	5	5	5	5	5	5
41	2	2	2	2	1	3	4	5	5	5	2	4	5	4	1	3	5	4	4	3	4	5	5	5	5	4	4	4	4	5	4	4	4	4	5	5	5	5	5	5	5	5	5	5	5	5	5	5	4
31	1	2	4	2	4	4	5	5	5	5	5	5	5	5	5	5	5	5	5	2	5	5	5	5	5	3	4	2	4	2	5	4	4	5	4	5	4	4	4	4	3	4	5	5	5	5	5	2	2
32	2	2	3	2	2	3	4	2	2	4	2	2	2	2	3	4	4	4	5	3	4	5	5	5	5	4	4	4	4	4	2	2	2	3	4	3	4	4	4	4	4	4	4	4	4	4	5	4	4
33	2	2	2	2	5	5	4	4	5	5	3	4	4	5	5	4	4	5	5	5	5	5	5	5	5	5	5	4	4	4	4	4	4	4	4	4	4	4	4	3	5	5	5	4	5	5	5	5	4
34	2	1	3	2	2	4	2	4	4	4	4	4	4	4	4	4	4	2	2	4	2	5	5	5	5	4	4	4	4	4	4	4	4	4	4	4	4	5	5	5	2	2	4	5	5	5	5	5	5
27	1	2	3	2	5	5	5	5	5	5	5	5	4	3	5	5	5	5	5	5	5	5	5	5	5	5	5	5	5	5	5	5	5	5	5	5	5	5	5	5	5	5	5	5	5	5	5	5	5
50	2	1	3	2	5	4	5	4	2	4	2	3	4	5	5	5	4	4	5	4	5	5	5	5	5	4	4	5	5	4	5	5	5	5	5	5	5	5	4	5	5	5	5	5	5	5	5	5	5
50	2	2	2	2	2	4	3	5	5	5	3	5	4	5	4	4	1	1	5	5	5	4	5	5	5	5	5	5	5	5	5	5	5	5	5	5	5	4	4	4	5	5	5	5	5	5	5	5	5
21	1	1	3	2	4	5	2	3	4	5	5	4	4	4	4	4	4	5	5	5	5	5	5	5	5	5	5	4	5	5	5	5	5	5	4	5	5	5	5	5	5	5	5	5	5	5	5	5	5
35	2	1	3	2	5	5	4	5	5	5	4	4	5	4	5	5	5	5	5	4	5	5	5	5	5	5	5	4	5	5	4	4	4	5	4	4	4	5	5	5	5	5	5	5	5	5	5	5	4
54	2	2	2	2	5	5	2	3	2	4	2	2	3	3	3	1	1	5	1	5	5	5	5	5	5	4	1	2	1	1	3	3	3	4	3	3	4	2	1	2	4	4	5	5	5	5	5	4	2
32	1	2	2	2	4	1	1	4	5	2	4	2	2	2	5	5	4	5	5	4	5	5	5	5	5	4	4	4	4	5	1	1	2	4	4	4	2	2	2	5	2	5	4	5	5	5	5	4	4
39	2	1	3	2	5	5	3	4	4	3	4	2	4	5	5	5	5	5	5	5	5	5	5	5	5	4	4	5	5	5	5	4	4	4	5	5	5	5	4	4	1	2	5	5	5	5	5	4	4
50	2	2	4	2	4	4	5	5	5	5	5	5	4	4	5	5	5	5	5	1	5	5	5	5	5	5	5	4	5	5	5	5	5	5	3	4	5	5	5	5	5	5	4	5	5	5	5	5	4
39	2	2	2	2	5	3	3	4	4	4	4	4	4	4	3	5	5	5	5	1	1	5	5	5	5	5	5	5	5	5	5	5	3	5	3	3	3	5	5	5	5	5	5	4	5	5	5	5	5
32	2	2	3	2	3	5	5	5	5	5	4	4	4	4	5	5	4	5	5	3	5	5	5	5	5	5	5	4	4	4	5	5	5	5	5	5	5	5	5	5	5	5	5	5	5	5	5	5	4
39	1	2	2	1	3	1	4	3	5	4	4	4	4	2	4	3	1	5	5	2	4	5	4	5	5	3	3	5	5	5	4	4	4	5	4	3	3	4	3	5	4	4	5	4	4	4	3	4	4
27	2	1	3	3	1	3	4	5	4	4	1	2	4	3	5	4	4	5	5	4	5	5	5	5	5	4	3	4	5	4	5	4	5	5	5	5	5	5	5	5	2	3	4	4	5	5	5	5	5
31	1	2	3	2	5	5	5	3	4	5	5	5	5	5	5	5	5	2	3	1	3	5	5	5	5	5	4	5	5	5	5	5	5	5	5	5	5	5	5	5	5	3	5	5	5	5	5	5	5
64	2	2	1	2	4	5	5	3	3	4	2	2	4	4	4	2	1	5	5	4	5	5	5	5	5	3	3	4	5	5	5	4	4	5	5	4	5	5	5	4	4	4	4	5	5	5	5	5	5
55	2	2	3	2	5	5	5	5	4	5	2	5	5	5	5	4	2	5	4	2	5	5	5	5	5	5	5	5	4	5	4	4	4	4	5	5	4	5	5	5	4	5	5	5	5	5	5	5	4
37	2	1	4	2	2	5	5	3	4	4	4	4	5	5	5	5	5	5	5	5	5	5	5	5	5	5	5	5	5	5	5	5	5	5	5	5	5	5	5	5	3	5	5	5	5	5	5	5	4
51	2	2	2	2	2	4	5	2	2	5	5	4	5	5	5	4	4	5	2	4	4	5	4	5	5	5	4	5	5	5	4	5	4	4	5	4	5	5	5	2	5	5	5	5	5	5	5	2	4
43	1	2	2	2	1	5	4	5	5	5	5	4	5	4	5	5	5	2	2	1	5	5	5	5	5	2	2	4	4	5	5	4	5	5	5	5	2	5	5	5	2	4	4	1	5	5	5	4	4
24	1	1	3	2	1	4	5	4	5	5	5	5	5	4	5	5	1	5	5	3	4	5	5	5	5	5	5	5	5	5	4	5	5	5	3	3	3	5	5	5	5	4	5	5	5	5	5	5	5
35	2	2	2	2	2	1	3	2	5	1	2	1	2	3	2	2	1	4	5	5	5	5	5	5	5	3	3	1	2	1	2	1	1	1	2	2	1	1	1	1	5	5	5	5	5	1	2	2	2
66	2	1	1	2	1	5	3	5	5	5	5	5	5	5	5	5	1	5	5	1	5	5	5	5	5	5	5	5	5	5	5	5	5	5	5	5	5	5	5	5	5	5	5	5	5	5	5	5	5
59	2	2	2	2	2	1	3	5	5	5	5	5	5	5	5	4	1	5	5	2	1	5	5	5	5	4	5	5	5	5	5	5	5	5	5	5	5	5	5	5	1	1	5	5	5	5	5	5	5
30	2	1	4	2	4	3	5	5	5	5	5	5	5	5	4	5	5	5	5	5	5	5	4	5	5	5	5	4	4	5	5	5	4	5	4	5	4	5	5	5	5	5	5	5	5	4	5	5	4
42	2	2	3	2	4	4	4	2	4	4	4	4	4	2	4	2	4	5	5	4	4	5	5	5	5	4	4	5	5	5	4	5	4	2	2	2	4	5	4	4	5	5	5	4	5	5	5	5	5
34	2	2	4	2	3	2	1	2	2	2	2	2	2	2	4	4	4	4	4	2	2	5	2	2	2	4	4	4	3	2	3	4	4	4	3	3	3	4	4	2	3	3	3	4	4	2	4	4	4
35	2	1	3	2	5	5	5	5	5	5	5	5	5	5	1	5	1	5	5	1	5	5	4	5	5	5	5	3	3	3	3	3	3	3	3	3	3	3	3	3	1	1	1	4	5	5	5	3	3
23	2	2	2	2	2	4	2	2	2	2	4	4	4	4	1	1	4	3	5	4	4	5	5	5	5	3	4	2	2	2	2	2	2	2	4	4	4	5	5	5	1	1	1	5	5	5	5	4	4
48	2	2	2	1	4	4	3	1	4	1	2	2	2	2	2	2	2	4	2	2	4	4	3	4	4	1	1	2	4	4	5	5	5	5	2	4	4	5	5	5	2	2	4	4	4	4	4	4	2
39	2	2	3	2	2	2	1	1	1	3	4	1	1	3	2	1	1	2	5	1	1	5	1	3	2	1	1	1	1	4	2	3	2	1	2	2	2	3	1	2	5	1	1	1	2	4	5	1	1
39	1	2	2	2	2	1	2	3	2	3	2	1	4	4	2	3	3	2	5	3	4	5	4	5	5	1	2	1	2	1	3	3	3	3	1	2	3	4	4	4	4	4	4	5	5	5	4	3	3
38	2	1	4	2	4	5	2	4	3	2	4	3	3	4	4	4	4	5	5	5	5	5	5	5	4	5	5	4	4	5	4	4	4	5	3	4	4	5	5	5	5	5	5	5	5	5	5	5	5
40	1	2	3	2	1	5	5	4	5	5	4	5	5	5	2	4	4	5	4	1	4	5	5	5	5	5	5	5	5	5	5	5	5	5	5	5	5	5	5	5	4	5	5	5	5	5	5	5	5
27	1	1	3	2	4	3	3	3	3	3	3	3	3	3	3	3	4	2	2	4	5	5	5	4	4	4	4	4	4	4	4	3	3	3	3	3	3	3	3	3	2	4	2	3	4	4	4	4	3
36	2	2	4	3	1	2	2	2	2	2	2	2	2	2	2	1	3	2	2	3	2	4	4	5	5	4	4	2	2	2	2	2	2	2	2	2	2	2	2	2	4	4	4	4	4	4	4	3	3
41	2	2	3	2	5	5	5	4	5	4	5	5	5	5	5	5	5	5	5	4	3	5	5	5	5	5	5	4	4	4	3	3	4	3	4	3	3	5	5	5	4	4	5	5	5	5	5	3	3
46	2	2	1	2	5	5	4	1	1	3	1	1	1	1	1	5	5	5	5	5	5	5	5	5	5	3	3	1	1	1	1	1	3	3	3	4	4	4	3	3	4	4	5	5	5	5	5	3	3
38	2	2	4	2	5	1	5	1	1	1	5	1	3	3	4	3	4	5	5	5	5	5	5	5	5	5	5	2	1	1	4	4	4	4	3	3	4	4	4	4	5	5	5	5	5	5	5	3	5
22	1	1	3	2	4	5	4	4	4	4	2	2	3	4	4	4	5	5	5	4	4	5	4	4	4	5	4	1	2	2	5	5	4	4	4	4	4	4	4	5	5	5	5	5	5	5	5	4	4
44	2	2	2	2	5	4	3	5	5	5	3	4	4	5	5	3	3	5	5	5	5	5	5	5	5	5	5	4	4	4	5	5	5	3	3	4	4	5	5	4	5	5	5	5	5	5	5	5	5
33	1	1	3	3	4	1	4	5	5	5	4	4	5	5	5	4	4	5	5	1	5	5	5	5	5	4	4	4	5	4	3	3	4	3	4	4	3	5	5	5	5	5	5	5	5	5	5	4	3
40	2	2	2	2	2	5	2	4	4	4	4	5	5	5	5	5	1	5	5	5	5	5	5	5	5	4	4	5	5	5	5	4	4	4	4	4	4	5	5	5	5	5	5	5	5	5	5	5	5
40	1	2	2	2	2	2	3	3	4	4	5	5	4	4	5	4	4	5	4	3	4	2	4	5	5	4	3	2	4	4	4	3	4	3	5	4	4	4	4	4	3	4	4	5	5	5	5	4	3
48	2	2	2	2	1	3	1	1	1	1	1	1	1	1	1	1	3	5	5	1	5	5	2	5	5	1	1	4	4	5	5	5	5	5	3	4	4	5	5	3	5	5	5	5	5	5	5	5	3
38	2	2	2	3	1	1	1	3	3	3	2	5	4	5	1	1	2	5	5	5	5	5	5	5	5	5	5	5	5	5	5	5	5	5	5	5	2	4	1	4	3	1	5	5	5	5	5	5	5
36	2	2	2	2	5	3	1	3	1	3	1	1	3	3	1	4	4	1	3	5	4	3	4	4	5	1	1	3	1	4	4	3	4	5	3	3	3	5	4	3	4	3	3	5	5	5	5	4	4
59	2	2	3	3	4	4	4	5	5	4	5	4	4	4	5	4	4	5	4	4	5	5	5	5	5	5	5	4	4	4	5	5	4	4	4	4	3	5	5	5	2	5	5	5	5	5	5	4	4
52	2	2	2	2	2	4	3	4	4	4	2	2	4	4	4	3	2	5	2	4	2	5	4	2	4	4	4	3	4	4	3	4	3	4	3	4	4	4	4	4	5	5	5	5	5	5	5	4	2
30	2	1	3	3	4	5	4	3	4	4	5	5	4	4	5	5	5	5	5	4	5	4	3	5	5	4	4	3	3	3	4	4	4	4	3	3	3	4	4	4	4	4	5	5	5	5	5	5	4
41	2	2	3	3	5	5	5	4	5	4	5	2	4	4	5	5	5	5	5	5	5	5	5	5	5	5	5	1	2	2	4	3	3	3	4	4	4	5	4	5	5	5	5	5	5	5	5	4	4
34	2	1	4	2	4	4	4	2	4	4	4	2	4	4	4	1	4	4	4	3	5	5	3	5	5	4	4	1	1	1	4	4	4	4	4	4	4	3	4	4	2	4	3	4	5	5	5	3	3
36	2	2	2	2	2	1	3	5	5	5	4	5	3	3	2	2	2	5	5	4	5	5	5	4	5	#NULL!	4	5	5	5	4	4	5	4	5	4	4	5	5	4	5	5	5	5	4	4	5	4	5
56	2	2	2	1	5	2	2	3	4	3	1	2	3	2	4	3	4	4	5	5	5	5	5	5	5	4	5	3	4	3	2	3	4	4	2	2	2	3	2	3	5	5	5	4	4	5	5	2	1
27	1	1	3	1	3	1	4	3	4	3	4	3	3	2	2	3	3	5	5	4	4	5	5	4	5	4	3	4	3	3	2	3	2	2	2	3	2	3	4	3	4	4	4	3	4	4	3	4	5
42	2	1	3	3	1	5	5	5	5	5	5	5	5	5	5	1	1	5	5	5	5	5	5	5	5	5	5	5	5	5	5	5	5	5	5	5	5	5	5	5	5	5	5	5	5	5	5	5	4
30	1	1	3	2	2	3	2	3	3	3	2	2	2	3	2	5	4	4	4	4	5	2	1	2	4	2	4	1	1	1	1	1	3	3	2	3	3	1	1	3	3	5	4	3	3	1	1	2	1
28	1	1	4	3	4	4	2	5	5	5	4	4	4	1	5	5	5	4	4	2	3	5	5	5	5	4	4	2	2	2	2	2	2	2	2	2	2	2	2	2	2	2	4	2	2	5	5	3	3
43	2	2	2	2	1	5	5	4	4	4	3	5	5	5	5	5	5	4	4	3	5	5	2	5	5	5	5	4	4	4	4	4	4	4	4	4	4	5	5	5	1	1	2	5	5	5	5	5	5
21	2	1	3	2	4	3	4	5	5	5	2	4	4	4	4	4	4	5	5	5	5	5	5	5	5	5	5	5	5	4	4	5	5	5	4	5	4	5	5	5	5	5	5	5	5	5	5	5	5
27	2	1	3	3	5	1	4	2	2	2	1	2	1	2	2	3	3	5	5	5	5	5	5	5	5	4	4	2	2	2	4	4	4	4	4	4	4	4	4	4	5	5	5	5	5	5	5	3	3
59	2	2	2	2	2	4	3	5	5	5	3	2	2	3	4	5	5	5	5	3	5	4	5	5	5	5	4	2	3	3	4	4	5	4	4	3	3	4	3	4	4	4	4	4	4	4	4	4	4
35	2	2	3	2	4	5	5	5	5	5	4	4	4	4	5	4	4	5	5	4	5	5	5	5	5	5	5	4	4	4	4	4	4	4	5	4	4	5	5	5	4	5	5	5	5	5	5	5	4
34	1	1	3	2	4	2	4	4	4	4	2	2	2	2	4	4	4	4	5	5	4	4	4	5	5	4	4	5	5	5	4	5	5	5	4	4	4	4	4	4	4	4	4	4	4	4	4	4	4
32	2	1	4	2	4	3	4	4	5	5	5	4	5	5	5	4	1	4	5	4	5	5	4	5	5	5	5	4	4	5	5	5	5	5	5	5	5	5	5	5	4	3	5	5	5	5	5	4	3
34	2	1	4	3	5	5	5	4	4	4	5	5	5	5	5	5	5	5	5	2	5	5	4	5	5	5	5	4	4	4	4	4	4	4	4	4	4	4	4	4	5	5	5	4	5	5	5	5	4
35	1	2	4	3	5	3	1	1	3	5	4	3	3	3	4	5	5	3	5	3	5	4	4	4	4	4	4	4	3	1	3	2	4	5	3	2	5	3	2	1	5	5	5	5	5	3	3	4	4
22	1	11	3	2	4	4	4	3	3	3	4	4	5	5	4	4	5	4	3	4	5	5	4	5	5	3	3	3	4	4	5	4	5	4	4	4	4	4	5	5	4	4	4	5	4	4	5	5	5
51	2	2	4	2	2	3	3	3	4	4	3	2	3	3	4	4	4	5	5	3	4	5	5	5	5	#NULL!	3	3	4	5	3	3	3	3	4	3	5	4	4	4	5	5	5	5	5	5	5	4	5
51	2	2	4	3	1	4	4	4	4	2	2	2	2	2	2	2	2	4	5	4	4	4	4	4	4	2	2	4	4	4	4	2	2	2	2	2	2	4	4	2	4	4	5	5	5	5	5	4	5
32	2	1	4	2	1	1	1	5	5	5	4	3	2	3	5	5	5	5	5	2	3	4	3	5	5	4	4	5	5	5	5	5	5	3	5	5	5	5	5	5	5	5	5	5	5	5	5	5	5
21	1	1	2	2	3	3	1	2	2	2	1	2	3	2	4	5	3	2	4	3	5	5	5	5	3	3	3	5	5	5	3	4	4	4	4	4	4	4	4	4	5	5	5	5	5	5	5	5	5
40	2	2	4	3	5	5	5	4	5	5	4	4	4	4	4	4	4	5	5	5	5	5	5	5	5	5	5	1	1	1	1	1	1	1	1	1	1	1	1	1	3	3	5	5	5	5	5	3	3
27	1	1	3	2	4	4	2	4	4	4	2	4	4	4	4	4	4	5	5	5	4	5	5	5	5	4	2	4	4	2	4	2	2	2	4	4	4	5	5	5	5	5	5	5	5	5	5	5	4
38	2	2	2	2	2	3	4	3	5	4	4	4	4	5	2	5	5	5	5	5	5	5	5	5	5	5	5	4	5	4	4	4	5	2	5	5	4	5	4	5	5	5	5	5	5	5	5	5	5
35	2	2	2	2	2	5	2	5	5	4	5	4	4	5	5	5	2	5	5	5	4	5	5	5	5	5	5	5	5	5	5	5	5	5	5	5	5	5	5	5	5	5	5	5	5	5	5	5	4
32	2	1	3	2	1	1	1	5	5	1	1	4	2	2	5	1	5	5	5	5	5	5	3	5	3	3	3	5	2	4	5	5	5	5	3	4	5	5	2	5	5	5	5	5	5	3	3	5	3
30	2	1	3	2	1	1	4	5	5	5	5	5	5	5	5	5	5	5	5	5	5	5	5	5	5	5	5	3	3	3	3	4	4	4	5	5	5	5	5	5	4	5	5	5	5	5	5	5	5
46	2	2	2	2	4	2	4	4	3	2	1	2	2	4	4	4	4	5	4	5	4	5	4	4	5	4	4	4	5	5	5	4	5	5	4	4	4	5	5	5	5	5	5	5	5	5	5	5	5
44	1	2	4	3	1	5	5	3	3	4	5	5	5	5	5	5	5	5	4	1	1	5	5	5	5	4	4	5	4	4	5	5	5	5	5	5	5	5	5	5	2	5	5	4	5	5	5	5	1
51	1	2	2	2	4	3	4	4	5	2	4	2	2	5	4	5	3	2	5	4	2	5	3	2	2	5	4	4	4	2	4	5	4	4	1	5	4	5	4	2	1	4	2	2	5	3	2	4	2
42	2	2	2	2	4	1	5	5	5	4	3	2	3	3	4	3	3	3	4	1	4	4	5	5	5	4	4	3	4	3	3	3	3	3	3	3	3	4	4	3	2	2	4	4	4	4	4	4	3
24	2	2	3	2	4	4	4	5	4	4	4	5	4	4	4	5	4	5	5	5	5	5	5	5	5	4	4	5	5	5	5	5	5	5	5	4	5	5	5	5	5	5	5	5	5	5	5	4	4
53	2	2	2	2	4	4	5	4	5	5	4	4	4	3	3	4	5	5	5	5	5	5	5	5	5	5	5	5	5	4	5	5	5	5	5	5	5	5	5	4	5	5	5	5	5	5	5	5	5
38	2	2	3	2	2	2	1	5	4	4	5	3	4	4	4	4	4	5	5	5	5	5	4	4	5	3	3	4	4	4	4	4	4	3	3	4	3	5	4	4	4	4	5	4	5	4	4	5	4
60	1	2	2	2	5	5	5	5	5	5	5	5	5	5	5	1	1	5	5	1	1	5	5	5	5	5	5	5	5	5	5	5	5	5	5	5	5	5	5	1	5	5	5	5	5	5	5	5	4
41	2	2	2	1	1	1	5	2	4	5	4	5	1	5	5	4	1	5	5	5	5	5	5	5	5	5	5	5	5	5	5	5	5	5	5	5	5	5	5	5	5	5	5	5	5	5	5	5	5
26	2	2	3	2	2	2	3	2	5	4	3	2	4	3	5	4	5	4	4	2	4	5	4	5	5	4	4	2	2	2	2	2	3	3	3	3	3	3	3	3	2	2	4	2	4	4	4	4	3
40	2	2	3	1	5	2	2	3	3	3	3	3	5	3	3	3	3	5	5	5	5	5	5	5	5	3	3	5	4	4	5	5	5	5	4	3	5	5	5	2	2	4	4	5	5	5	5	4	3
58	2	2	3	3	1	5	5	5	5	5	5	5	5	5	1	2	5	5	1	1	1	5	5	5	5	5	5	4	3	4	5	5	5	5	5	5	5	5	5	5	5	5	5	5	5	5	5	5	5
40	2	2	3	3	4	4	2	4	4	4	4	4	4	3	2	4	4	4	4	4	4	4	4	4	5	4	4	5	5	5	4	5	4	4	4	4	4	2	4	3	5	5	5	5	5	5	5	5	4
36	1	2	4	2	4	5	2	4	4	4	3	5	5	5	5	5	5	5	5	1	5	5	5	5	5	5	5	5	5	5	4	5	5	5	5	3	5	5	5	5	4	4	5	5	5	5	4	3	5
48	2	2	2	2	5	2	4	5	5	5	4	5	5	5	5	5	2	5	5	1	3	5	5	5	5	3	5	5	2	3	4	4	4	4	5	5	5	5	4	4	5	5	5	5	5	5	5	5	5
40	2	2	2	2	4	5	5	5	4	4	4	4	4	4	4	2	2	5	5	5	5	5	5	5	5	5	4	5	5	5	5	5	5	5	5	5	5	5	5	5	5	5	5	5	55	5	5	4	4
36	2	2	3	2	4	4	4	4	4	4	4	4	4	5	5	5	5	5	5	2	5	5	5	5	5	4	4	2	4	4	5	5	5	5	5	5	5	5	5	5	4	5	5	5	5	5	5	5	5
41	2	2	1	1	4	4	5	5	5	4	5	5	4	5	1	1	1	4	5	5	3	5	5	5	5	5	5	5	5	4	4	5	4	4	4	4	5	5	5	5	4	5	5	5	5	5	5	5	5
55	2	2	1	1	5	4	5	5	5	3	5	5	3	3	5	5	4	5	5	5	5	5	4	5	5	5	5	5	4	5	4	3	3	3	5	3	3	5	5	4	5	3	5	5	4	4	5	5	3
20	2	1	2	3	2	4	5	3	5	4	5	3	4	4	1	3	3	1	5	1	5	5	2	5	5	4	4	1	2	5	5	5	5	5	5	5	5	5	5	5	1	1	4	5	4	4	4	5	5
28	2	1	3	2	5	4	4	4	4	5	4	5	4	4	4	4	3	5	5	4	5	5	5	5	5	5	5	5	4	4	4	4	4	4	4	4	4	5	4	4	4	5	5	5	5	5	5	5	4
32	2	1	3	2	4	4	4	2	4	3	2	4	2	4	4	5	4	4	5	3	5	5	5	5	5	5	5	2	2	4	2	2	2	4	4	4	2	4	4	4	5	5	5	5	5	5	5	5	4
43	1	2	3	2	4	2	2	4	4	4	2	2	2	4	4	4	4	2	3	4	5	5	4	5	5	4	4	2	2	2	2	2	2	2	4	4	4	4	4	4	2	2	2	4	4	4	4	4	4
32	2	2	3	2	5	5	4	5	5	5	4	4	5	5	5	5	5	5	5	3	5	5	5	5	5	5	4	5	3	4	5	4	4	4	5	4	5	5	5	4	5	5	4	5	5	5	5	5	2
33	2	2	3	2	4	2	2	3	4	3	4	2	4	3	5	5	3	5	5	3	5	5	4	4	5	5	5	4	4	5	4	3	4	4	3	4	4	4	4	5	2	4	5	5	5	5	5	5	5
32	2	1	4	3	5	5	5	2	5	4	5	5	5	5	5	2	5	5	5	1	5	5	5	5	5	5	5	2	5	5	5	5	5	5	4	1	1	1	5	5	2	1	5	5	5	5	5	5	4
21	1	1	3	2	2	3	4	4	4	4	5	3	4	4	2	3	3	4	4	2	4	5	4	5	5	4	4	5	5	5	4	5	5	5	4	4	4	5	4	1	4	3	3	5	5	5	5	5	5
40	2	2	3	2	4	3	5	5	4	5	4	4	4	5	5	4	4	5	5	3	5	5	5	5	5	5	5	5	4	5	5	5	5	5	5	4	3	5	5	5	5	5	5	5	5	5	5	5	2
33	2	2	3	1	3	3	3	2	2	2	2	2	3	3	3	2	3	4	4	4	4	4	4	4	4	3	3	3	3	3	3	3	3	3	3	3	3	3	3	3	4	4	4	4	4	4	4	3	3
58	2	1	4	2	4	4	4	4	4	3	3	3	3	4	3	4	3	4	5	5	4	4	5	5	5	3	3	4	4	4	4	5	4	5	3	3	3	3	4	4	5	5	5	4	4	4	4	4	5
38	2	2	4	2	2	1	5	5	5	5	4	4	4	4	4	2	1	5	5	4	2	5	4	5	5	5	3	4	4	5	5	4	3	4	4	3	2	4	4	4	1	4	5	4	4	4	5	5	5
32	2	1	3	2	4	1	1	4	3	3	3	4	4	3	5	4	2	5	4	4	4	4	5	5	5	5	5	5	4	5	5	5	4	4	5	5	4	5	4	3	3	3	5	5	5	5	4	5	4
35	2	1	3	2	4	2	2	4	5	5	4	4	4	4	5	5	4	5	5	5	5	5	5	5	5	5	5	5	4	5	5	5	5	5	5	5	5	5	5	5	4	4	5	5	5	5	5	5	5
41	2	2	3	2	4	5	5	5	5	5	4	4	5	5	5	5	5	5	5	4	5	5	5	5	5	4	5	5	5	5	5	5	5	5	5	5	5	5	5	5	5	5	5	5	5	5	5	5	5
46	2	2	3	2	5	3	3	5	5	5	5	5	2	4	5	5	5	5	5	5	5	5	5	5	5	5	5	5	5	4	5	5	5	5	5	5	5	5	5	4	5	5	5	5	5	5	5	5	5
49	2	2	2	2	4	5	4	4	4	5	2	4	4	4	4	4	5	5	4	1	2	5	5	5	5	4	2	1	2	2	2	2	2	2	3	2	2	4	2	2	2	4	5	4	5	4	4	3	3
55	2	2	2	2	1	2	2	4	4	4	4	5	5	5	5	5	5	5	5	5	5	5	5	5	5	4	4	4	5	4	4	4	4	4	5	5	4	4	4	4	4	4	4	4	5	5	5	5	4
45	2	2	3	2	3	4	5	5	5	2	5	5	5	5	5	5	5	5	5	2	5	5	5	5	5	4	4	5	5	4	4	4	4	5	4	5	4	3	5	2	5	5	5	5	5	5	5	4	4
42	2	2	3	2	2	5	2	3	3	4	2	2	3	2	5	5	5	5	5	5	5	5	4	5	5	4	3	2	3	4	4	2	4	4	4	4	3	5	5	5	4	5	5	5	5	5	5	5	5
40	2	2	3	3	5	5	5	5	5	5	5	4	5	5	5	5	5	4	5	4	5	5	5	5	5	4	4	5	5	5	4	4	5	5	4	4	5	5	5	5	4	4	5	5	5	5	5	5	5
41	1	2	2	2	2	2	1	5	5	4	3	4	4	3	4	4	4	5	5	4	5	5	5	5	5	4	4	5	4	5	4	4	4	4	4	3	4	5	5	4	5	5	5	5	5	5	5	5	5
28	1	1	2	2	5	1	1	1	4	2	1	1	1	1	1	1	1	5	5	5	5	5	5	5	5	4	2	1	1	2	5	5	4	4	4	4	4	5	5	2	5	5	5	4	5	5	5	4	4
34	2	1	3	2	5	5	5	5	5	5	5	5	5	5	5	5	5	5	4	3	2	5	5	5	5	5	5	5	5	5	5	5	5	5	5	5	5	5	5	5	3	3	5	5	5	5	5	5	5
54	2	2	2	2	5	5	4	5	4	5	5	5	5	5	5	5	5	5	5	5	4	5	5	5	5	5	5	4	4	4	4	4	4	4	4	4	4	5	4	4	5	5	5	5	5	5	5	5	4
25	2	2	4	3	5	5	5	5	5	5	4	5	5	5	1	4	4	5	5	5	5	5	5	5	5	5	5	5	5	5	5	5	5	5	4	4	5	5	5	5	2	1	2	5	5	5	5	5	5
36	1	2	4	2	3	4	2	3	5	5	5	5	4	5	4	3	2	5	5	4	5	4	4	4	4	4	4	2	2	2	3	3	3	3	2	2	2	2	2	2	4	4	3	5	5	5	5	3	3
40	1	2	4	2	1	5	5	3	4	2	4	4	4	3	4	4	4	2	5	5	2	5	5	4	5	2	2	5	4	5	4	4	3	5	2	3	4	5	5	5	2	4	5	5	5	5	5	4	4
36	2	2	3	2	5	5	5	4	5	4	5	5	4	4	4	3	4	4	4	4	4	4	5	4	5	5	4	2	4	4	4	4	3	4	3	3	3	3	4	3	4	4	4	5	5	4	5	3	5
41	1	2	3	3	5	2	5	2	4	2	5	5	5	4	5	4	5	3	4	4	5	5	4	5	5	3	3	4	5	4	4	4	3	4	4	4	3	5	5	4	5	5	5	5	5	5	5	5	5
34	2	1	3	2	4	4	4	4	4	4	3	5	4	4	5	5	4	5	4	2	3	5	5	5	5	5	5	5	4	4	2	3	3	3	3	3	3	5	5	5	1	5	5	5	5	5	5	5	5
44	2	2	3	3	3	4	4	3	4	4	2	4	4	4	5	4	4	5	5	4	5	5	5	5	5	5	5	5	5	5	5	5	5	5	4	4	4	5	5	5	5	5	5	5	5	5	5	5	5
43	1	2	2	2	4	3	5	5	5	5	4	5	5	5	5	4	5	5	5	5	5	5	5	5	5	3	3	5	5	5	5	5	5	5	5	5	5	3	5	5	5	5	5	5	5	5	5	3	3
44	2	1	3	1	4	5	5	4	3	4	5	5	5	5	2	4	4	4	3	2	5	5	4	5	5	1	1	5	5	5	5	5	4	4	5	4	3	4	5	5	2	3	4	5	5	5	5	5	5
39	2	2	3	2	4	3	2	4	4	3	4	2	3	4	4	4	4	4	5	4	4	5	5	5	5	5	4	4	4	4	4	4	4	4	5	4	4	5	5	5	5	5	5	5	5	5	5	5	4
35	2	1	2	2	3	3	1	3	5	4	2	5	3	3	3	4	1	5	4	5	3	5	5	5	5	3	3	4	4	5	4	4	4	3	3	2	2	5	5	4	4	5	1	5	5	5	5	4	4
35	2	2	3	3	2	4	2	5	5	4	4	4	3	3	5	5	5	4	4	1	3	5	5	5	5	3	3	4	2	4	4	4	4	4	4	4	3	4	4	4	5	5	5	5	5	5	5	3	3
37	1	2	4	2	3	5	5	4	5	4	3	5	4	5	5	5	5	5	5	5	5	5	5	5	4	5	5	4	4	4	5	5	5	5	5	5	5	5	5	5	5	5	5	5	4	5	5	5	3
59	2	2	2	3	1	5	5	5	5	5	5	5	5	5	5	5	5	5	5	3	5	5	5	5	5	3	3	5	5	5	5	5	5	5	5	5	5	3	4	5	5	5	5	5	5	5	5	5	3
30	1	1	4	3	1	5	5	5	5	5	5	1	4	5	4	4	1	3	5	5	4	5	5	5	5	5	5	5	5	5	5	5	5	5	5	5	5	5	5	5	5	5	5	5	5	5	5	5	5
58	2	2	3	2	5	5	5	4	5	5	4	4	5	4	5	5	5	5	5	4	5	5	5	5	5	5	5	2	4	4	4	4	4	4	4	4	4	5	4	5	4	4	5	5	5	5	5	5	4
39	2	2	2	2	4	5	4	4	4	5	5	4	5	5	5	5	5	5	5	5	5	5	5	5	5	5	5	4	4	4	4	4	4	4	5	5	5	5	5	5	5	5	5	5	5	5	5	5	4
21	2	1	2	3	2	3	4	5	5	5	4	5	4	5	5	5	5	5	5	5	5	5	5	5	5	5	5	4	4	4	5	5	5	5	5	5	5	5	5	5	5	5	5	5	5	5	5	5	1
23	2	1	3	2	2	4	4	3	5	4	4	1	4	3	4	3	2	2	5	1	2	5	4	5	5	4	4	4	4	1	5	4	4	4	4	4	5	2	4	4	1	3	4	4	5	4	4	2	2
25	2	1	3	3	4	4	4	5	4	4	4	3	4	4	5	4	4	5	5	5	5	5	5	5	5	5	5	4	4	4	4	4	3	2	4	4	4	2	2	2	5	5	5	5	5	5	5	5	4
42	2	1	4	2	5	2	2	1	2	1	2	1	1	2	4	4	4	5	5	5	5	5	5	5	5	2	2	5	2	2	4	2	5	5	1	1	1	5	5	1	5	5	5	5	5	5	5	5	2
35	2	2	2	3	4	5	4	4	4	4	2	4	4	4	5	4	2	5	5	4	4	5	5	5	5	5	5	4	4	4	4	4	4	4	4	4	4	4	4	4	4	5	5	5	5	5	5	5	5
41	2	2	2	3	1	1	5	3	4	4	5	5	4	3	5	4	5	5	5	2	4	5	5	5	5	4	4	4	4	4	3	4	4	5	4	4	4	5	4	4	5	5	5	5	5	5	5	4	1
42	2	2	3	2	2	2	1	5	4	4	4	3	4	4	5	4	3	5	5	2	5	5	5	5	5	4	4	5	4	5	4	5	2	5	2	4	4	5	5	4	5	5	5	5	5	5	5	5	2
32	2	2	3	2	4	5	4	5	5	5	4	3	3	4	5	5	5	4	4	3	4	5	5	5	5	3	2	3	2	4	3	3	3	3	3	3	3	4	4	4	5	5	5	5	5	5	5	3	3
42	2	2	3	2	2	2	3	3	4	4	4	5	5	4	5	5	4	4	5	5	5	5	5	5	5	4	4	4	5	5	4	5	4	5	5	5	5	5	5	5	4	2	2	5	5	5	5	5	5
39	1	2	3	3	5	4	1	5	4	5	1	2	1	2	1	1	1	5	5	5	5	5	5	5	5	4	4	3	2	5	1	1	1	1	3	1	1	1	1	2	5	5	5	5	5	5	5	4	4
42	2	2	2	2	2	3	4	5	4	3	2	4	5	4	5	5	5	5	5	5	5	5	5	5	5	5	5	5	5	5	5	5	5	5	5	5	5	5	5	5	5	5	5	5	5	5	5	5	5
24	1	1	2	2	3	2	5	4	3	4	4	4	5	4	4	4	4	4	3	5	3	5	4	3	3	5	4	4	5	5	4	4	4	4	3	4	2	2	4	4	2	5	5	5	3	2	3	4	5
20	1	3	3	2	5	3	5	5	5	5	4	5	5	5	5	5	5	5	5	3	2	5	5	5	5	5	5	5	5	5	5	5	5	5	5	5	5	5	5	5	5	5	5	5	5	5	5	5	5
45	2	2	4	3	4	4	4	4	4	4	5	5	5	5	4	4	1	5	5	2	5	5	5	5	5	4	4	5	5	5	5	5	5	5	5	5	5	5	5	5	5	5	5	5	5	5	5	5	5
35	2	2	3	2	5	5	4	5	5	5	2	2	5	5	5	5	5	5	5	5	5	5	5	5	5	5	5	4	4	4	5	5	5	5	5	5	5	5	5	5	5	5	5	5	5	5	5	5	5
37	2	1	2	3	1	2	5	5	5	4	4	4	5	5	5	5	5	5	5	5	5	5	5	5	5	5	5	4	5	5	4	5	5	4	5	4	4	5	5	5	4	5	5	5	5	5	5	5	3
19	2	1	2	2	4	5	5	5	5	5	5	5	5	5	5	5	5	5	5	5	5	5	5	5	5	5	5	5	5	5	5	5	5	5	5	5	5	5	5	5	5	5	5	5	5	5	5	5	5
39	2	2	3	2	2	4	2	4	4	4	4	4	4	3	4	4	4	5	5	5	5	5	4	5	5	4	4	4	4	4	4	3	4	4	4	3	4	5	5	5	5	5	5	5	5	5	5	5	4
46	2	2	4	2	3	3	1	1	1	1	1	1	1	3	4	2	1	1	1	1	1	3	3	2	1	1	1	5	5	5	5	5	5	5	5	5	4	5	5	5	5	5	4	5	5	5	5	5	5
46	2	1	2	2	2	5	5	4	5	5	4	5	5	4	5	5	5	5	5	2	5	5	5	5	5	5	3	5	5	5	5	5	5	5	5	4	5	5	5	5	5	5	5	5	5	5	5	5	4
52	2	2	4	3	2	4	1	4	5	4	4	2	2	3	5	5	3	5	4	5	3	5	5	5	5	5	5	4	5	5	4	5	5	5	4	3	4	5	5	5	5	5	5	5	5	5	5	5	5
41	1	2	2	2	2	1	1	1	3	4	1	3	2	4	4	5	5	5	5	5	5	5	5	5	5	5	5	5	5	5	5	5	5	2	2	4	5	5	5	5	1	5	5	5	5	5	5	5	5
18	2	1	2	2	2	2	2	5	5	4	4	4	4	4	4	3	4	5	5	4	5	5	5	5	5	4	2	5	4	5	5	5	5	5	4	3	5	4	4	3	3	3	5	5	5	5	5	5	5
50	2	2	2	2	2	5	3	4	5	5	5	5	5	5	2	2	2	5	5	1	4	5	5	5	5	4	4	4	4	4	4	4	4	4	5	5	5	4	4	3	5	5	4	5	5	5	5	4	4
24	2	1	3	1	2	2	5	4	4	4	4	4	4	4	4	4	4	4	4	4	4	4	4	4	4	4	4	4	4	4	4	4	4	4	4	3	3	4	4	4	3	33	3	4	3	3	3	3	3
18	1	2	2	2	1	1	3	3	4	4	2	2	3	4	1	4	4	1	4	2	4	5	4	5	5	4	4	5	5	5	4	3	5	5	5	1	4	5	5	5	4	3	4	5	5	5	5	5	5
41	1	2	3	2	4	2	4	2	2	2	4	3	2	3	4	2	2	4	44	4	4	4	4	4	4	4	3	2	2	2	2	2	2	2	2	2	2	2	2	2	4	4	4	5	5	5	5	4	4
49	2	2	4	3	4	3	4	4	4	4	3	2	2	3	2	2	3	4	4	3	4	4	4	4	4	4	4	2	1	2	3	5	1	5	4	5	5	5	4	5	4	3	5	5	5	5	5	5	2
32	2	2	3	2	4	4	2	4	4	5	2	5	4	3	5	2	4	5	5	5	4	4	5	5	5	4	4	2	2	2	2	2	2	2	3	2	2	4	4	4	5	5	5	5	5	5	5	5	5
52	2	2	2	2	4	2	4	4	2	4	3	4	3	5	4	5	3	5	5	3	5	5	5	5	5	4	3	2	3	4	4	2	4	5	4	4	3	4	3	4	4	5	5	5	5	5	5	4	2
20	2	1	2	2	5	5	5	4	4	5	5	5	5	5	2	2	2	5	5	5	5	5	5	5	5	5	5	1	1	1	3	3	3	3	3	3	3	4	4	5	5	5	5	5	5	5	5	5	5
39	2	2	2	2	4	2	3	2	2	3	2	4	2	4	5	4	3	4	5	5	4	5	4	4	5	3	5	3	4	4	5	5	4	2	4	4	5	5	5	5	5	4	4	5	5	4	5	4	4
[truncated: 61 more columns]
